# Supplementary material for: Pharmacological HDAC inhibition impairs pancreatic β-cell function through an epigenome-wide reprogramming
Source: PubMed Central journal article supplement — iScience. 2023 Jun 30;26(7):107231. doi: 10.1016/j.isci.2023.107231 (PMC10366467; doi:10.1016/j.isci.2023.107231), 2023-06-30
Supplement: mmc1.pdf [file mmc1.pdf]

## **Supplemental information**

### **Pharmacological HDAC inhibition impairs pancreatic $\beta$ -cell function through an epigenome-wide reprogramming**

**Frédéric Oger, Maeva Moreno, Mehdi Derhourhi, Bryan Thiroux, Lionel Berberian, Cyril Bourouh, Emmanuelle Durand, Souhila Amanzougarene, Alaa Badreddine, Etienne Blanc, Olivier Molendi-Coste, Laurent Pineau, Gianni Pasquetti, Laure Rolland, Charlène Carney, Florine Bornaque, Emilie Courty, Céline Gheeraert, Jérôme Eeckhoute, David Dombrowicz, Julie Kerr-Conte, François Pattou, Bart Staels, Philippe Froguel, Amélie Bonnefond, and Jean-Sébastien Annicotte**

**A**

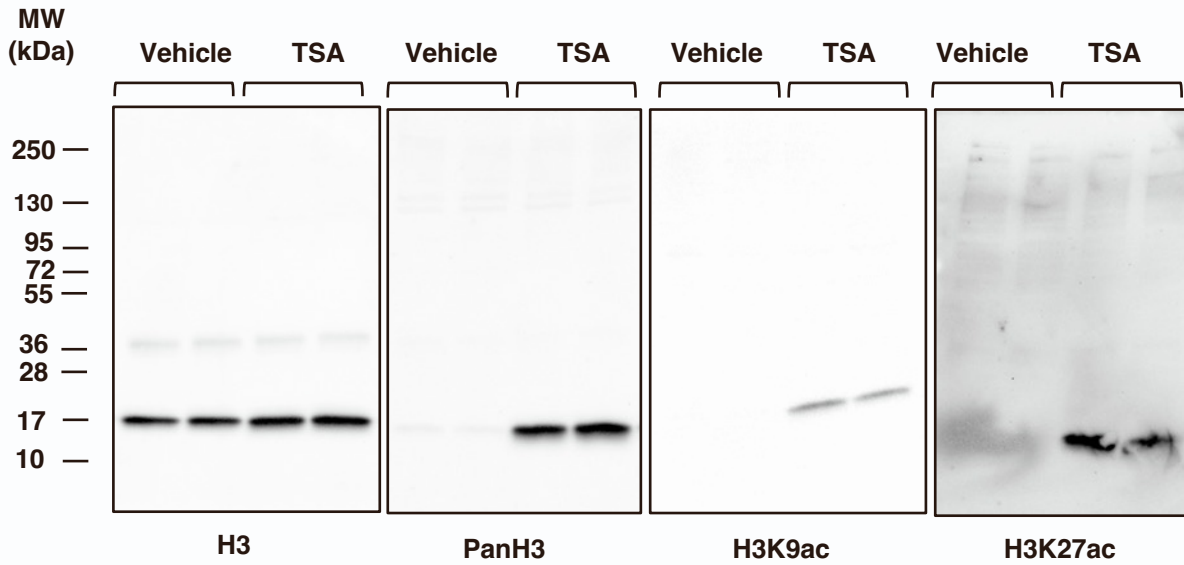

**B**

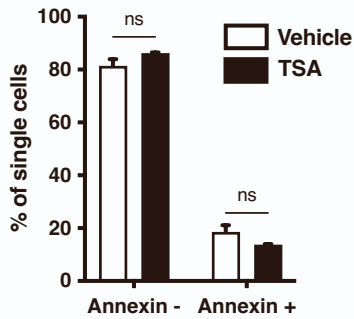

**C**

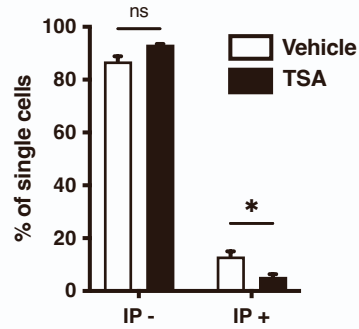

**D**

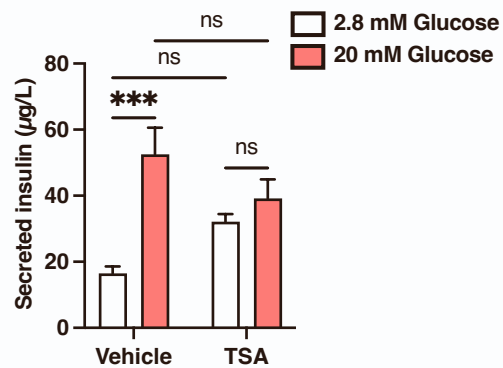

**E**

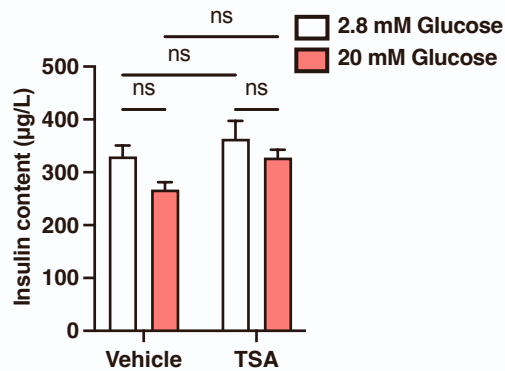

**A**

**H3K4me3**

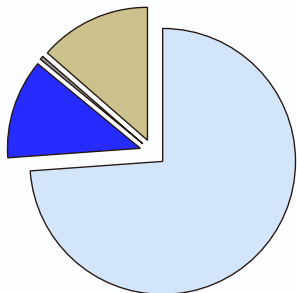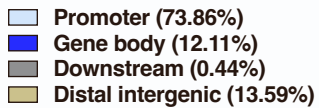

**B**

**H3K27ac**

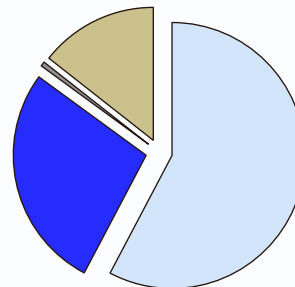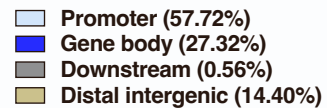

**C**

**H3K4me1**

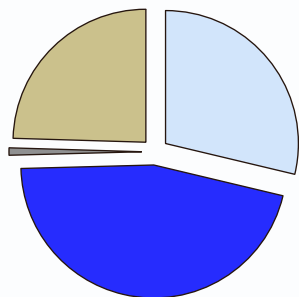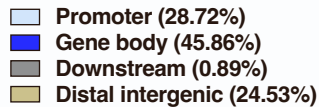

**D**

**H3K27me3**

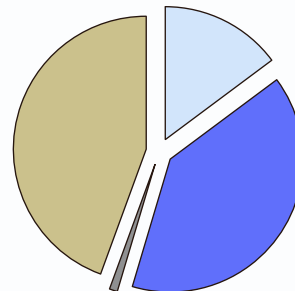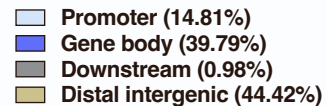

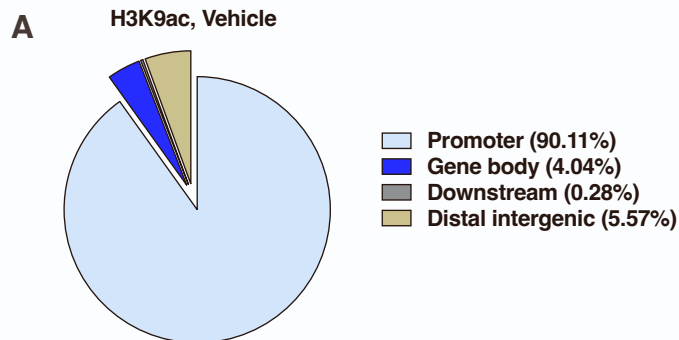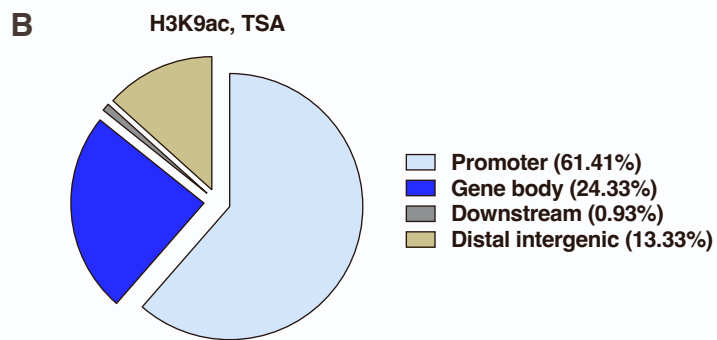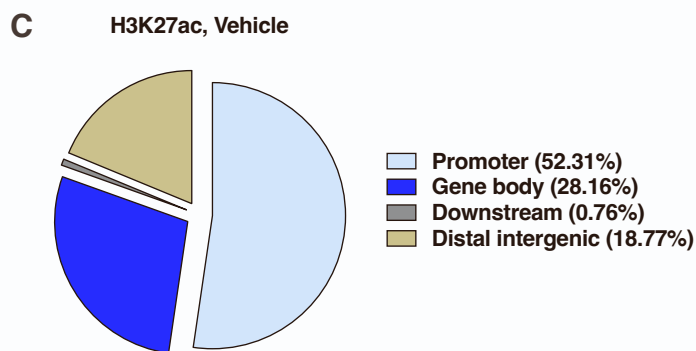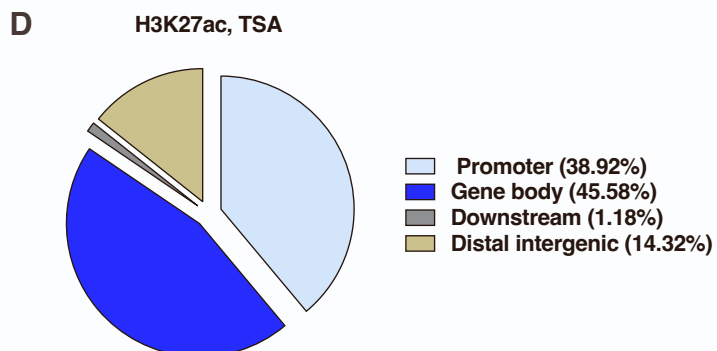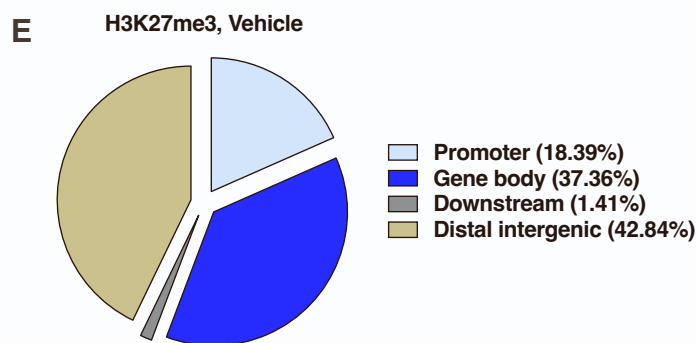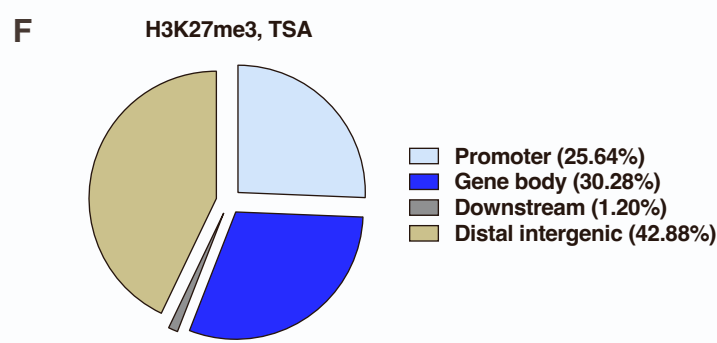

A

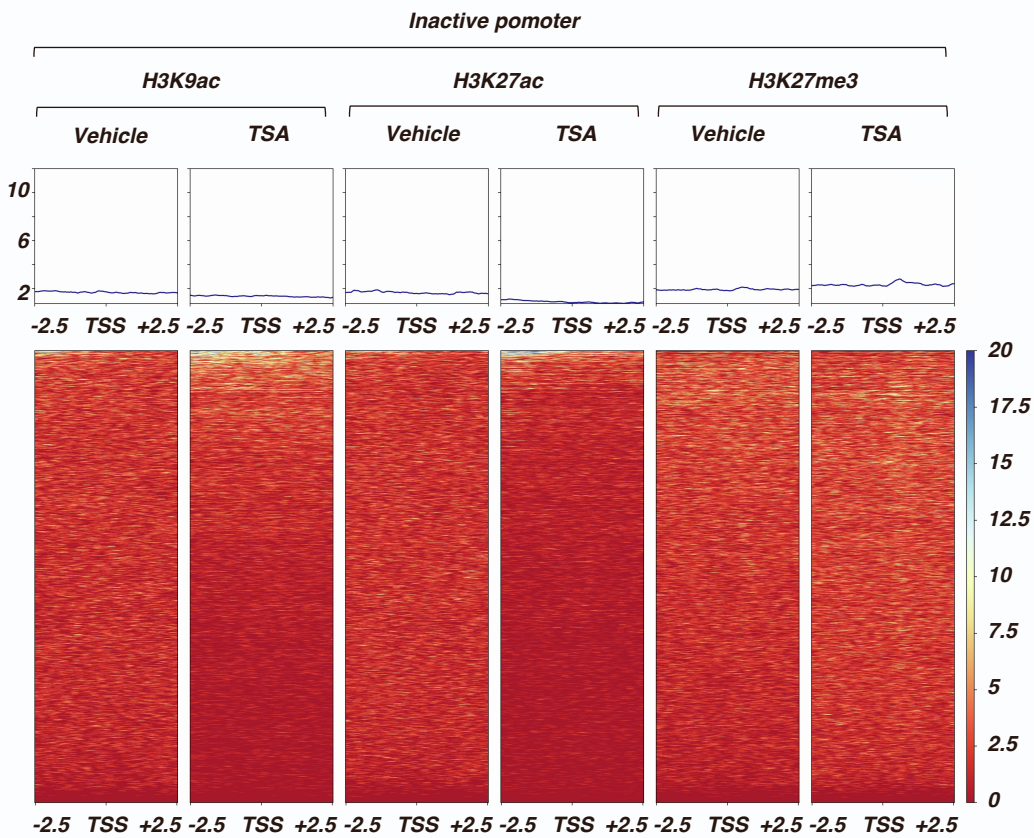

B

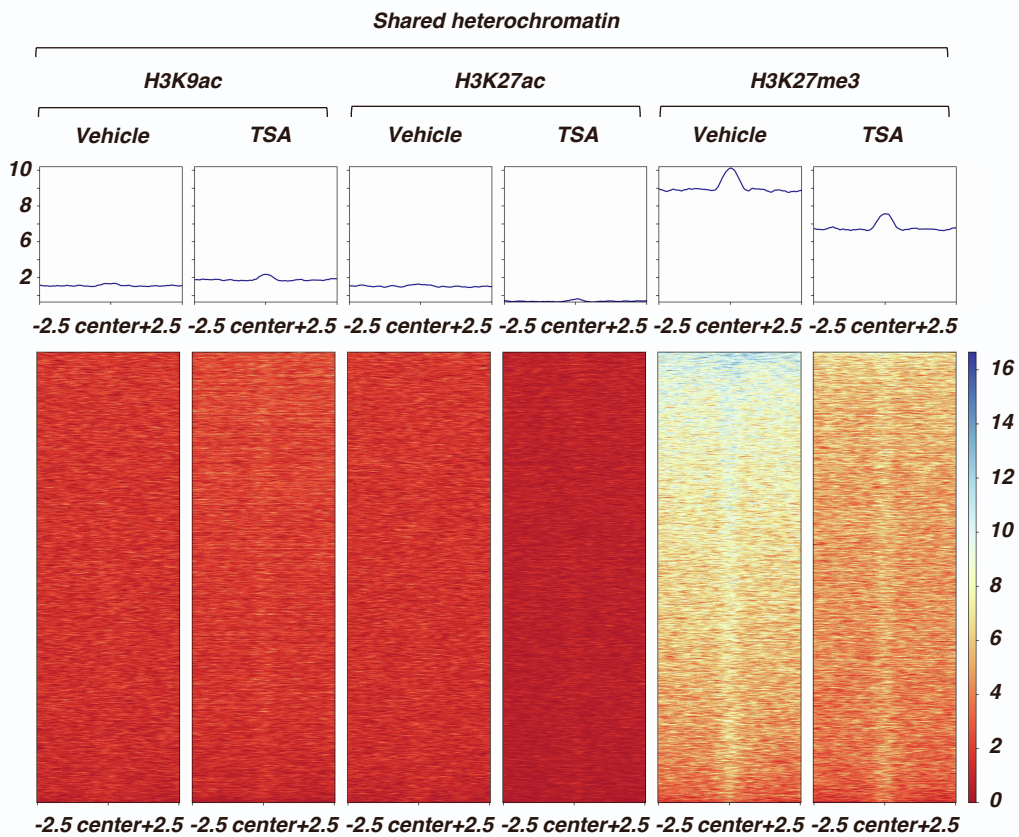

**A**

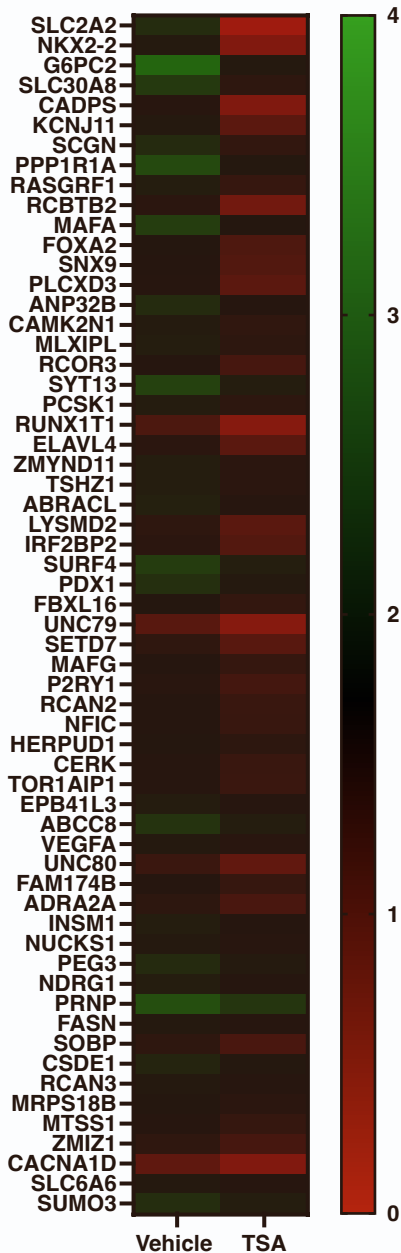

**B**

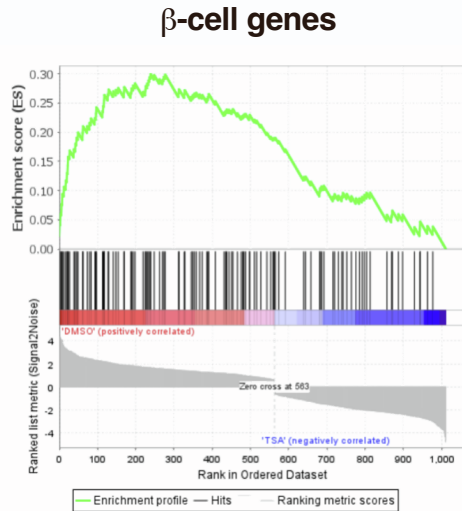

**C**

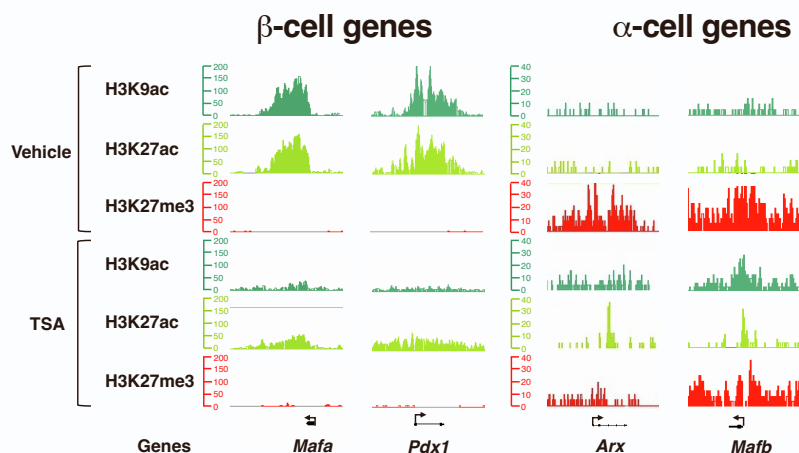

A

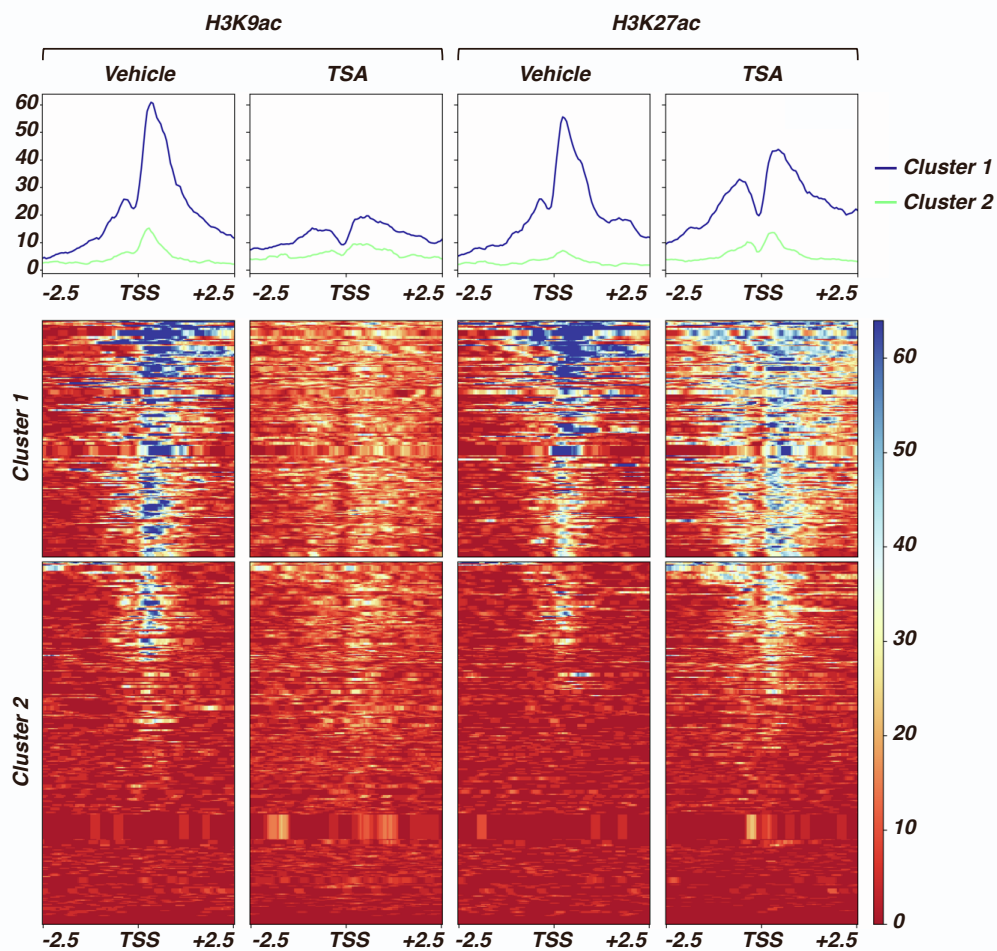

B

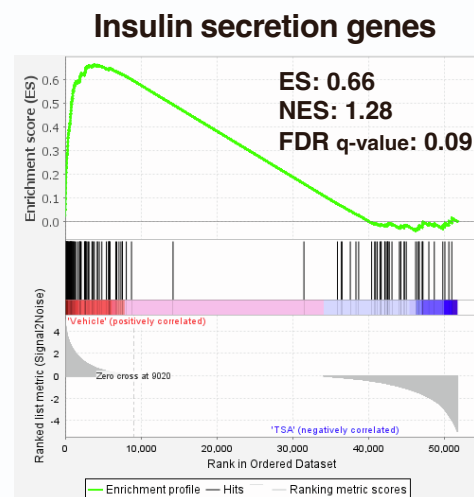

C

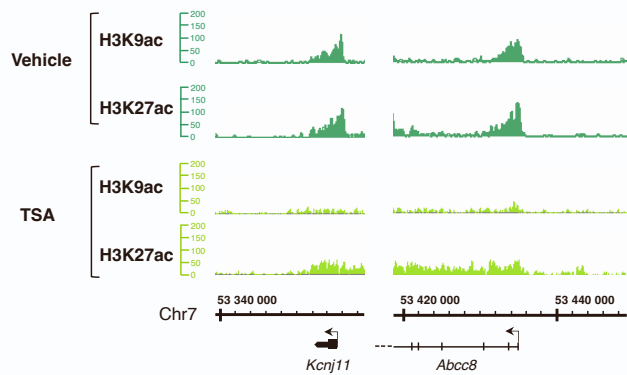

D

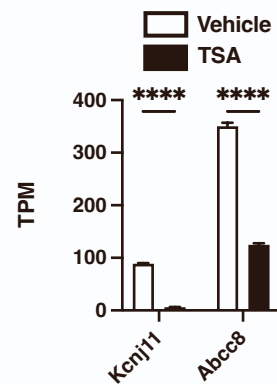

**Supplementary Figure S1. Effect of TSA treatment on histone acetylation, apoptosis, proliferation and insulin levels in Min6 cells, Related to Figure 1. (A)**

Levels of histone H3, global acetylation (PanH3ac) and acetylation of lysine 9 (H3K9ac) and lysine 27 (H3K27ac) were monitored by western blot analysis in vehicle- and TSA- treated Min 6 cells (0.5  $\mu$ M, 16h, n=2). **(B-C)** Annexin V (B) and propidium iodide (C) labelling of TSA-treated Min6 cells (0.5  $\mu$ M, 16h, n=3). Vehicle (DMSO 0.1%, n=3) was used as negative control. Annexin - : annexin V negative cells, Annexin + : annexin V positive cells. IP - : propidium iodide negative cells, IP + : propidium iodide positive cells. Results in A and B are displayed as % of single cells recorded by FACS +/- SEM. \* p<0.05, ns: not significant. **(D-E)** Glucose-stimulated insulin secretion of TSA-treated cells (0.5  $\mu$ M, 16h, n=7). Vehicle (DMSO 0.1%) was used as a control. Results are presented mean +/- SEM of secreted insulin (D) and insulin content (E) in response to 2.8 mM and 20 mM glucose. \* p<0.05, \*\*\* p<0.001 (Two-way Anova). ns=not significant.

**Supplementary Figure S2. Genomic distribution of histone marks in Min6 cells, Related to Figure 2. (A-D)**

Individual genomic distribution of H3K4me3, H3K4me1, H3K27ac and H3K27me3 in Min6 cells. The percentage of peaks for each histone mark within 4 distinct genomic segments is displayed in a pie chart (promoter (TSS +/- 2.5 kb), gene body, downstream of genes and distal intergenic regions).

**Supplementary Figure S3. Genomic distribution of histone marks in Min6 cells upon TSA treatment, Related to Figure 5. (A-F)**

Individual genomic distribution of H3K9ac (A-B), H3K27ac (C-D) and H3K27me3 (E-F) in vehicle- (A, C and E) and TSA-treated (B, D and F) Min6 cells. The percentage of peaks for each histone mark within 4 distinct genomic segments is displayed in a pie chart (promoter (TSS +/- 2.5 kb), gene body, downstream of genes and distal intergenic regions).

**Supplementary Figure S4. Genomic distribution of histone marks in inactive promoters and shared heterochromatin in Min6 cells upon TSA treatment, Related to Figure 5. (A)**

H3K9ac, H3K27ac and H3K27me3 signal in conserved inactive promoters in vehicle- and TSA-treated Min6 cells. Heatmap and mean signal centered on TSS +/- 2.5kb are displayed. **(B)** H3K9ac, H3K27ac and H3K27me3 signal in conserved heterochromatin in vehicle- and TSA-treated Min6 cells. Heatmap and mean signal centered on TSS +/- 2.5kb are displayed.



**Supplementary Figure S5. Differential gene expression and histone acetylation upon TSA treatment in Min6 cells, Related to Figure 6.** (A) Heatmap representing gene expression levels of  $\beta$ -cell genes in vehicle and TSA-treated Min6 cells. (B) Enrichment plot from Gene Set Enrichment Analysis (GSEA). GSEA was conducted with 60 genes set enriched in  $\beta$  cells. (C) Examples of functional genomic regions of  $\beta$ -cell (*Pdx1*, *Mafa*) and  $\alpha$ -cell genes (*Arx*, *Mafb*) in vehicle and TSA-treated Min6 cells showing H3K9ac, H3K27ac and H3K27me3 marks. Figures are adapted from the IGB genome browser screenshots.

**Supplementary Figure S6. Differential gene expression and histone acetylation profiles of genes involved in insulin secretion upon TSA treatment in Min6 cells, Related to Figure 6.** (A) Heatmap displaying H3K9ac and H3K27ac level in response to TSA treatment in Min6 cells within TSS-centered promoters of insulin secretion-associated genes (n=583 transcripts). K-means clustering (2 clusters) was applied to discriminate TSA-remodeled promoters (cluster 1; 118 genes, Supplementary Table S2) from unaffected ones (cluster 2, 168 genes, Supplementary Table S3). (B) Enrichment plot from Gene Set Enrichment Analysis (GSEA). GSEA was conducted with 118 genes belonging to cluster 1. (C) Examples of remodeled promoters (*Abcc8* and *Kcnj11*) in vehicle and TSA-treated Min6 cells showing H3K9ac and H3K27ac marks. Figures are adapted from the IGB genome browser screenshots. (D) Expression levels (TPM) of *Abcc8* and *Kcnj11* in vehicle- and TSA-treated Min6 cells. \*\*\*\*  $p < 0.005$  (Two-way Anova).
